# Supplementary material
Source: PubMed Central journal article supplement (PMC3401481)

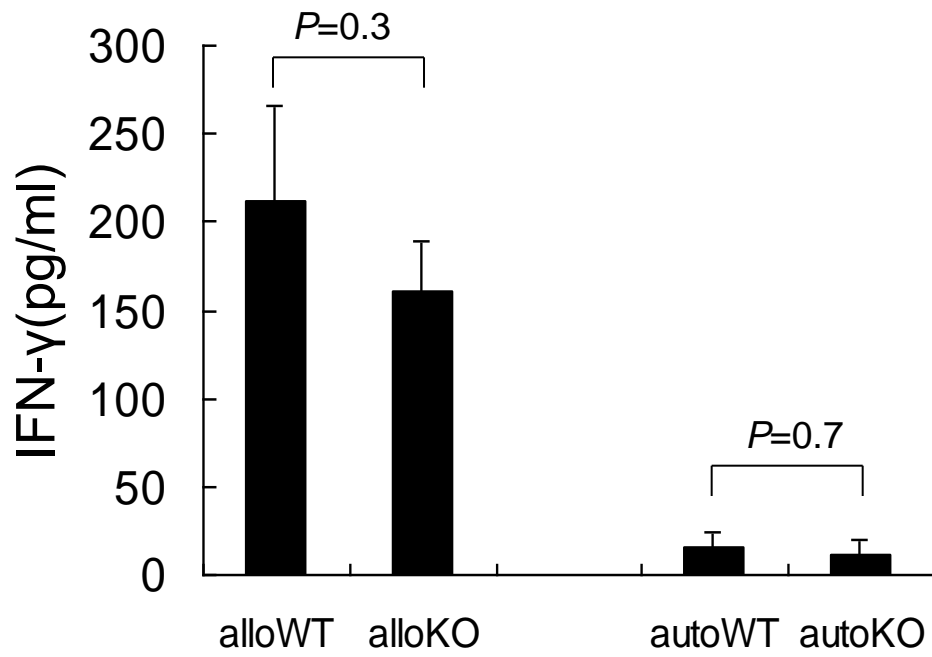

CD90

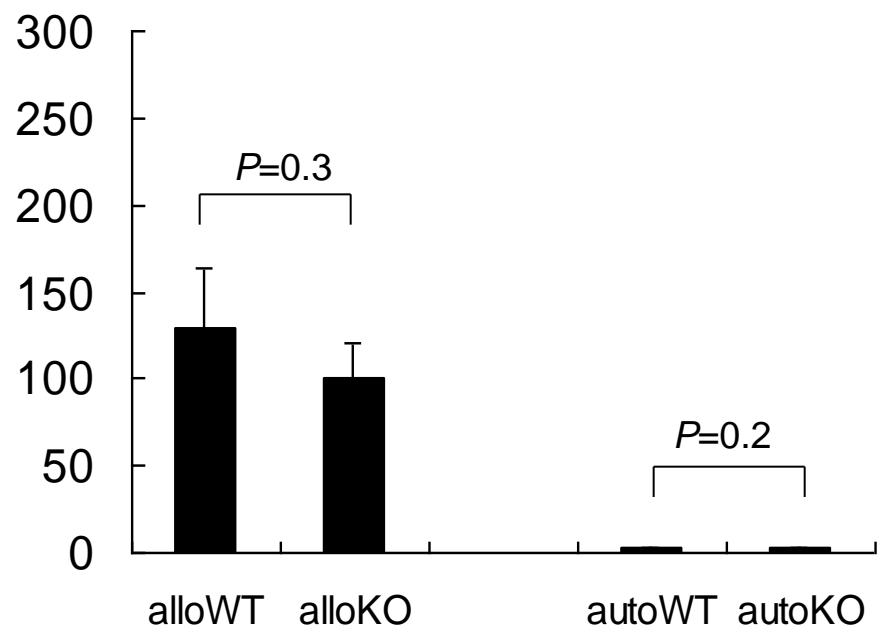

CD8

Supplement: NIHMS392309-supplement-Supplemental_Figure_1.pdf [file NIHMS392309-supplement-Supplemental_Figure_1.pdf]
